# Supplementary material for: Evaluation of a ddPCR Commercial Assay for the Absolute Quantification of the Monkeypox Virus West Africa in Clinical Samples
Source: MDPI journal article supplement (doi:10.3390/diagnostics13071349), 2023-04-04
Supplement: s1 [file s1]

**Figure S1.** Sequence of the synthetic Gblock DNA.

**Synthetic DNA Sequence for Positive Controls**

Gblock Sequence:

```
CCCATGAGACATACAAAAAGGTAATGCCGCCTCGCTAGGTGAGCTACAGCTCGATT  
GTCACGTTAAGCTGGCCAGTTCAAATCCCTGTTGCATTAATTTACCAGTAATGAGT  
CTTTTCGATACAGGTAAATTTCCACATCGATATAGTTAAATGTATTGCTGGTTACGA  
CGGGTTCGCATTTATCTGTGGAAGAGACGGTGTGTGACCTGGCTGTAGCTTAGGA  
GTAGCATGTTCTTTACGATCATAGTTCATTCATGAAACTATTTTATTCATCTCTCGGT  
GAAGCTTCAGAGAACTTTATTAGGTATGTTTACTTAACAAAAGAGTGCATTGGGGGT  
GATGAAGCCTAGTCAAATTCACAGAAAGCTAAGGAGGTCTCGACTATACGCCCCGT  
TTCGGATC
```

**Legend of excel files**

**Supplementary material Table S1.** ddPCR data sets of LoD experiments.

**Supplementary material Table S2.** ddPCR data sets in the clinical samples.
